1 **Influence of Illustrator’s Intentions and Visual Description Techniques of Medical**  
2 **Illustrations on Generating Interest and Boosting Comprehension of Medical**  
3 **Information**

4

5 Makiko Haragi<sup>1\*</sup>, Ryo Onozuka<sup>2</sup>, Ryosuke Nishida<sup>3</sup>, and Shimpei Koyama<sup>4</sup>

6

7 <sup>1</sup>Department of Health Sciences, Saitama Prefectural University, Saitama, Japan

8 <sup>2</sup>Institute for Liberal Arts, Tokyo Institute of Technology, Tokyo, Japan

9 <sup>3</sup>Institute for Liberal Arts, Tokyo Institute of Technology, Tokyo, Japan

10 <sup>4</sup>Faculty of Fine Arts, Tokyo University of the Arts, Tokyo, Japan

11

12 \*Corresponding author: Makiko Haragi

13 Department of Health Sciences, Saitama Prefectural University

14 Saitama, Japan

15 Tel: +81 80 4203 0310

16 Email: [haragi-makiko@spu.ac.jp](mailto:haragi-makiko@spu.ac.jp)

**NOTE: This preprint reports new research that has not been certified by peer review and should not be used to guide clinical practice.**

17 **Abstract**

18 In this study, an exploratory online survey was conducted to clarify points that have not  
19 been clarified so far in the medical illustration research field. If several illustrators make  
20 an illustration of the same information, does a match of intentions and techniques affect  
21 the impression or comprehension of the information? The aim is to further the utilization  
22 of medical illustration in actual practice (n=1104).

23 First, we selected Autosomal Dominant Polycystic Kidney Disease (ADPKD) as the  
24 medical condition about which information had to be disseminated. Then, we asked 32  
25 art professionals to make six illustrations with three detail types (high, middle, and low)  
26 and two purposes (“getting interested” and “boosting comprehension”). Thereafter, we  
27 selected six different types of art professionals’ illustrations for the questionnaire to ask  
28 the participants about the intentions of the illustrations and comprehension of the content.

29 We found that if the illustrator’s intentions and visual description techniques match with  
30 the recipients, the match of intentions could help generate interest in the content, and the  
31 match of visual description techniques could enhance the comprehension of the  
32 information.

### 33 **Introduction**

34 Communication in the medical field is called health communication. In particular, a  
35 communicative relationship between doctors and patients is an essential matter (1-4). It  
36 is the prime responsibility of doctors to explain every aspect of diseases to their patients  
37 (5, 6) as excellent communication can improve the outcome of the treatment procedure  
38 (3, 4, 7-9). As most patients are not familiar with medical terminologies, occasionally,  
39 some friction emerges in the health communication field (3, 10). Previous research has  
40 tried to find efficient ways to use verbal behaviors (11, 12), attitudes (13, 14), and cultural  
41 aspects (15, 16) to provide solutions to this problem. Currently, the use of illustrations is  
42 in the limelight as a measure of effective health communication.

43 Illustrations used in the medical field are called medical illustrations (sometimes called  
44 infographics or visual cues) and have been used to convey medical knowledge among  
45 physicians for a long time (17). Currently, doctors also transfer detailed medical  
46 information to patients and societies. Previous research has revealed that illustrations can  
47 encourage people to remember the information (18, 19), enhance understanding (20), and  
48 secure attention (21). Moreover, illustrations are practical for someone who has low

49 literacy, especially low medical literacy skills (18, 22, 23). Illustrations are mostly used  
50 to create concrete images of numeric information (24-26) or to depict details of diseases  
51 and affected areas comprehensively (27, 28). However, there are still plenty of things that  
52 remain to be clarified, as explained below.

53 In previous studies, several illustrations created by illustrators were used (29, 30). All  
54 medical illustrators cannot create the exact same illustrations as others because they  
55 would have different views, techniques, and aesthetic senses of creation (18). Considering  
56 these differences is vital for using medical illustration in the medical field to convey  
57 accurate information. However, previous studies have never conducted research using  
58 several illustrations created by various illustrators simultaneously.

59 Responding to the above statement, we assume that various illustrators' illustrations  
60 would include different intentions and techniques even though the purpose of the  
61 illustrations are the same. For instance, to create a brochure to convey medical  
62 information, one medical illustrator might exaggerate some part of the information to  
63 accomplish the purpose. The result might be something abnormal or grotesque. These  
64 varying intentions and technical details have remained concealed and never had the

65 opportunity of being revealed in previous studies. Thus, it is not clear whether these  
66 intentions and techniques could convey the information to the recipients accurately.  
67 However, we presume that if these intentions and techniques could affect the recipient's  
68 impression and comprehension, it is worth paying attention to them with the intent of  
69 conducting more efficient health communication.

70 Hence, in this research, we have set up an exploratory research question as follows:

71 RQ: When several illustrators make illustrations of the same information, does a match  
72 of intention and technique affect the impression on the recipients or their comprehension  
73 of the information?

74 We are convinced that studying this research question would reveal how to use medical  
75 illustration more intentionally and strategically in health communication. These  
76 perceptions would be helpful in all aspects of communication areas in the scientific field.

77

## 78 **Materials and methods**

79 This study employed a quantitative design comprising an online questionnaire to evaluate  
80 the research question. Prior to the study, some art professionals created medical

81 illustrations for different purposes. They were asked to describe their intention of  
82 illustrations and the techniques they have used. Thereafter, these responses were used for  
83 the completed questionnaire using an online survey and the research and analysis were  
84 conducted.

85 The survey was approved by the Ethical Review Board of Saitama Prefectural University  
86 (No. 20083), and informed consent was obtained from all participants through the online  
87 survey system. This study was conducted according to the principles of the Declaration  
88 of Helsinki.

89

#### 90 ***Selecting medical information***

91 Before conducting the research, we selected suitable medical information. The functions  
92 of medical illustrations are affected by participant base knowledge. A previous study  
93 revealed that if recipients of the information are familiar with the medical information,  
94 the illustration would not work well to enhance comprehension compared to those who  
95 are unfamiliar recipients of the same (31). Therefore, we had to select unfamiliar medical  
96 information to reduce the distraction factors for participants.

97 Moreover, we focused on selecting a medical condition that is not well known generically  
98 but essential in the medical field; thus, we selected Autosomal Dominant Polycystic  
99 Kidney Disease (ADPKD), the most common hereditary kidney disorder (32, 33).

100

### 101 *Setting medical illustration types*

102 After selecting the medical information to be imparted, we set the details and purposes of  
103 the illustrations. Previous studies divided illustration details into three types to understand  
104 the influences of the illustrations (29, 30). This study followed them and divided the  
105 details into three categories, as follows: realistic (high detail: HD), characteristic (medium  
106 detail: MD), and schematic (low detail: LD). Additionally, to find the “visual description  
107 techniques” of each illustrator, we divided the purposes of illustrations into two: “getting  
108 interested” and “boosting comprehension.” This point has been referenced in previous  
109 studies (27) that show that the most effective illustration, which got the recipients  
110 interested, differed from the most effective illustration, which favored comprehension.  
111 Subsequently, we made illustrators create normal drawings to clarify differences of  
112 “intentions” for each purpose. Hence, each illustrator created seven illustration types

113 **(Figure 1)**. We provided some ADPKD information, including simple exposition and  
114 pictures, to the illustrators to create the illustrations.

115

116 **Figure 1.** Types of illustrations drawn by an illustrator

117

118 *Developing medical illustrations*

119 Before the leading research, we made several medical illustrations of ADPKD. This part  
120 can be divided into two phases. First, we recruited four art professionals who have fine  
121 art college training for more than four years and have been involved in creating artworks  
122 for more than ten years in Japan. Then, we asked them to create seven types of illustration  
123 of ADPKD with two purposes, three details, and normal drawings. Afterward, we asked  
124 them to answer some questions: 1) What intentions have you included in each illustration?  
125 and 2) Point out the differences in the visual description techniques for each illustration,  
126 and provide corresponding feedback.

127 After modifying the methods based on the feedback and confirming the procedures, we  
128 proceeded to the second phase, gathering 35 art professionals and asking them to create



129 ADPKD illustrations and answer questions about intentions and visual description  
130 techniques. Eventually, we collected 32 professionals and 224 illustrations.

131

### 132 *Picking up the illustrations' intentions and visual description techniques*

133 First, we selected six different types of professional illustrators for the questionnaire to  
134 find out how each illustration affects the generation of interest and comprehension of  
135 medical information related to ADPKDs (**Figure 2**). From the six illustrators' responses  
136 to the abovementioned questions, we observed twelve keywords related to intentions (A)–  
137 (L) and seven different types of visual description techniques (a)–(g) (**Table 1**). Then,  
138 these categories were used for the core research questionnaire to determine whether the  
139 participants of the quantitative research could detect the same intentions and visual  
140 description techniques from each illustration as professionals.

141

142 **Figure 2.** Illustrations created by six art professionals

143

144 **Table 1.** Details of “Intentions” and “Visual description techniques”

| Intentions            | Visual description techniques             |
|-----------------------|-------------------------------------------|
| (A) Painful           | (a) Compare with normal and abnormal      |
| (B) Feel sick         | (b) Description of cross-sectional view   |
| (C) Interested        | (c) Description of cross-sectional        |
| (D) Bizarre           | (d) Description of progression of disease |
| (E) Grotesque         | (e) Exclude lurid                         |
| (F) Anguished         | (f) Description of simplicity             |
| (G) Abnormal          | (g) Description of features               |
| (H) Surprised         |                                           |
| (I) Fear              |                                           |
| (J) Vitality          |                                           |
| (K) Creeps            |                                           |
| (L) A sense of danger |                                           |

145

146 In the questionnaire, we showed illustrations created with three details and purpose by

147 each illustrator. We asked the participants which illustration was the most effective for

148 getting attention/boosting comprehension and made them pick the correct one. Afterward,  
149 we asked the participants about the visual description techniques and intentions for  
150 picking the illustrations by using (a)–(g) and (A)–(M), which were created from the art  
151 professionals’ answers. In this part, participants could choose applicable items without  
152 limitation. In addition to the above questions, the participants answered some preliminary  
153 questions on medical history and demographics before completing the questionnaire.

154

#### 155 *Contents of the questionnaire*

156 We used the following questions to gather information on the illustrations that generated  
157 the most interest and those that were the most comprehensible, and the participants’  
158 impression of the intentions and visual description techniques.

159 **(Q1)** Which illustration did you feel succeeded in getting you interested the most when  
160 accompanied by text? **(Q2)** Which illustration was the most comprehensible when  
161 accompanied by text? Participants chose each suitable one from the three types of  
162 illustrations (realistic, characteristic, and schematic) with respect to each illustrator’s  
163 creations.

164 Question 1's dependent variable was operationalized as a 7-point Likert scale from "not  
165 at all interested" to "very interested," and the dependent variable of question 2 used a 7-  
166 point Likert scale ranging from "did not boost comprehension at all" to "deepened  
167 comprehension very much."

168 In addition, with regard to each selected illustration, participants were asked to select the  
169 intentions and techniques from (A)–(L) and (a)–(g). In this part, participants could choose  
170 applicable items without limitation.

171

## 172 *Procedure and measures*

173 In this research, we selected Macromill, the largest online survey service in Japan, to  
174 conduct the survey. The survey was conducted by randomly selecting a sample of 1000  
175 respondents among the registered respondents on Macromill (500 male and 500 female).

176 For each gender, 100 participants were assigned for each of the age categories: 20s, 30s,  
177 40s, 50s, and over 60s. All participants were screened based on the condition that none  
178 of them are health care workers and not involved in the medical care field. We also asked  
179 demographic questions about marriage, children, household income, personal income,

180 and occupation.

181 We then asked about confounding factors that might affect their interest in and  
182 understanding of the illustration. These included the respondent's and family's  
183 experience of hospitalization, medical history, kidney function and shape, knowledge of  
184 the disease, methods of obtaining medical information, media preference, and work  
185 experience in illustration.

186 After the above questions, participants were presented with some information of ADPKD,  
187 including simple expositions and pictures.

188

### 189 *Analysis*

190 First, regarding the degree of correspondence between the illustrator's intentions and the  
191 respondents' comprehension, which is the independent variable, the following is to be  
192 noted.

193 This study has twelve intention categories, and an illustration can be mapped as a point  
194 in a twelve-dimensional space. For example, when an illustrator tries to convey "(A)  
195 Painful" and "(B) Feel sick," the intended intention can be expressed as vector  $a$  in

196 Equation 1. When the respondent answers “(A) Painful” or “(C) Interested,” the intention  
197 received can be expressed as vector  $b$  in Equation 2. The cosine of the angle between  
198 these two vectors is called the cosine similarity. If we use Equation 3, we can obtain it as  
199 a numerical value in an interval of  $-1$ , where the degree of correspondence is the least  
200 consistent, to  $1$ , where the degree of correspondence between the intended impression  
201 and received impression is the most consistent.

202

$$203 \quad a = (1, 1, 0, 0, 0, 0, 0, 0, 0, 0, 0, 0, 0, 0, 0) \quad (1)$$

$$204 \quad b = (1, 0, 1, 0, 0, 0, 0, 0, 0, 0, 0, 0, 0, 0, 0) \quad (2)$$

$$205 \quad \cos(a,b) = a \cdot b / \|a\| \|b\| \quad (3)$$

206

207 In the above sample, the cosine similarity is  $0.5$ , and the angle between vector  $a$  and vector  
208  $b$  is  $60$  degrees, which means they are relatively similar. The same formula was applied  
209 to the items in the right column of Table 1 for the degree of correspondence in the  
210 description.

211 Next, in addition to the single numerical value of the agreement, a dummy variable was

212 established to specifically observe which items related to intentions and visual description  
213 techniques were in agreement. For example, the variable is 1 if the respondent received  
214 the intention of “Painful” for an illustration that was intended to convey the intention of  
215 “Painful,” and 0 otherwise. The third independent variable was the one that asked the  
216 participants to choose which of the three types of illustration (HD, MD, or LD) was the  
217 best.

218 Using this analysis method, we approximated the dependent variables as continuous  
219 values (Norman, 2010), and statistical analysis was conducted using normal linear models,  
220 and four models were constructed.

221 The first model used response data about getting interested, with the degree of  
222 correspondence between intentions and visual description techniques as the independent  
223 variables.

224 The second model used response data about the comprehension of information, with the  
225 degree of correspondence between intentions and visual description techniques as the  
226 independent variables.

227 The third model used response data about getting interested and used the dummy variable

228 for the correspondence between intentions and visual description techniques as the  
229 independent variables.

230 The fourth model used responses on comprehension of information, with dummy  
231 variables for intentions and visual description techniques as independent variables.

232 All models contained confounding variables, in addition to the previously mentioned  
233 items, the type of details (HD, MD, or LD) as well as illustrators. The coefficients of each  
234 variable in the above models were interpreted at the 5% level of significance.

235

## 236 **Results**

### 237 *Sample descriptive statistics*

238 The total number of participants was N = 1104 (male = 555, female = 549). Other  
239 demographic items are shown in **Table 2**.

240

241 **Table 2.** Participant details

| Characteristic | Number (%) | Mean (SD) | Range |
|----------------|------------|-----------|-------|
| Total n        | 1104 (%)   |           |       |



---

---

|      |            |  |
|------|------------|--|
| Male | 555 (50.3) |  |
|------|------------|--|

---

|        |            |  |
|--------|------------|--|
| Female | 549 (49.7) |  |
|--------|------------|--|

---

|     |               |       |
|-----|---------------|-------|
| Age | 44.99 (14.86) | 20-79 |
|-----|---------------|-------|

---

---

|       |            |  |
|-------|------------|--|
| 20s n | 219 (19.9) |  |
|-------|------------|--|

---

|       |            |  |
|-------|------------|--|
| 30s n | 221 (20.1) |  |
|-------|------------|--|

---

|       |            |  |
|-------|------------|--|
| 40s n | 222 (20.2) |  |
|-------|------------|--|

---

|       |            |  |
|-------|------------|--|
| 50s n | 220 (20.0) |  |
|-------|------------|--|

---

|            |            |  |
|------------|------------|--|
| over 60s n | 222 (20.1) |  |
|------------|------------|--|

---

|           |  |  |
|-----------|--|--|
| Education |  |  |
|-----------|--|--|

---

|             |          |  |
|-------------|----------|--|
| Junior high | 28 (2.5) |  |
|-------------|----------|--|

---

|             |            |  |
|-------------|------------|--|
| Senior high | 365 (33.1) |  |
|-------------|------------|--|

---

|                   |            |  |
|-------------------|------------|--|
| Vocational school | 121 (11.0) |  |
|-------------------|------------|--|

---

|                |           |  |
|----------------|-----------|--|
| Junior college | 100 (9.1) |  |
|----------------|-----------|--|

---

|         |            |  |
|---------|------------|--|
| College | 448 (40.6) |  |
|---------|------------|--|

---

---

|                  |          |
|------------------|----------|
| Graduate college | 34 (3.1) |
| Other            | 8 (0.7)  |

---

242

243 ***Summary of the models in the research***

244 The following is a summary of the four statistical models created by this study (**Table 3**).

245 The dependent variable is the degree of interest; in Models 1 and 2, the independent

246 variables are the degree of correspondence of intentions and the degree of correspondence

247 of visual description techniques; in Models 3 and 4, they are dummy variables for

248 matched intentions and visual description techniques between illustrators and

249 respondents; Models 1 and 3 use data about getting interested, and Models 2 and 4 use

250 data about promoting comprehension. The confounding variables were included in the

251 models only to ensure the reliability of the coefficients of the explanatory variables.

252 Hence, their description is omitted in Table 3.

253

254 **Table 3.** Summary of the model

---

Dependent variable: Degree of coincidence (Intentions)

---

|                                 | Model1    | Model2       | Model3    | Model4        |
|---------------------------------|-----------|--------------|-----------|---------------|
| Data                            | Getting   | Boosting     | Getting   | Boosting      |
|                                 | intereste | comprehensio | intereste | comprehension |
|                                 | d         | n            | d         |               |
| Observations (n)                | 6618      | 6618         | 6618      | 6618          |
| Degree of coincidence           | .432***   | .594***      |           |               |
| (Intentions)                    |           |              |           |               |
| Degree of coincidence           | .785***   | .958***      |           |               |
| (Visual description techniques) |           |              |           |               |
| Intentions                      |           |              |           |               |
| (A) Painful                     |           |              | .173      | .317          |
| (B) Oddness                     |           |              | .412***   | .250          |
| (C) Interested                  |           |              | .492***   | .418**        |
| (D) Gross                       |           |              | .276***   | .146*         |
| (E) Oddness                     |           |              | .031      | .201***       |

|                                         |         |          |
|-----------------------------------------|---------|----------|
| (F) Anguished                           | .220    | .000     |
| (G) Abnormal                            | .415*** | .417***  |
| (H) Surprised                           | .476**  | .458**   |
| (I) Fear                                | .432*** | .592***  |
| (J) Vitality                            | .360    | .287     |
| (K) Creeps                              | .286*   | .119     |
| (L) A sense of danger                   | .794*** | .696***  |
| Visual description techniques           |         |          |
| (a) Compare with normal and abnormal    | .348**  | 1.011*** |
| (b) Description of cross-sectional view | .373    | .344***  |
| (c) Description of cross-sectional      | .153    | .104     |
| (d) Description of                      | .360**  | .536***  |

|                                          |         |         |         |         |
|------------------------------------------|---------|---------|---------|---------|
| progression of disease                   |         |         |         |         |
| (e) Exclude lurid                        |         |         | .380**  | .213*   |
| (f) Description of simplicity            |         |         | .405*** | .410*** |
| (g) Description of features              |         |         | .629*** | .614*** |
| Type                                     |         |         |         |         |
| Medium Detail (Compare with High Detail) | .346*** | .274*** | .226*** | .204*** |
| Low Detail (Compare with High Detail)    | .542*** | .567*** | .476*** | .468*** |
| AIC                                      | 24460   | 23920   | 24270   | 23680   |

255 \* p<.05; \*\* p<.01; \*\*\* p<.001

256

257 **Result of Models 1–4**

258 According to the table’s result, we focus on Models 1 and 2 first.

259 For both models—getting interested and promoting comprehension—the degree of

260 correspondence between illustrators and participants' intentions and visual description  
261 techniques had a significant effect. Additionally, the degree of descriptive  
262 correspondence had a stronger effect. Moreover, both coefficients were greater than 0.1  
263 for promoting comprehension rather than getting interested.

264 Next, regarding Model 3, in terms of getting interested, the intentions that had a  
265 significant positive impact on the level of interest were, in descending order of coefficient,  
266 Intentions (L), (C), (H), (I), (G), and (D). In contrast, the intention that had a negative  
267 impact was Intention (B). In terms of visual description techniques, (g), (f), (e), (d), and  
268 (a) had a positive influence, in that order.

269 In Model 4, the intentions that had a significant positive impact on the degree of interest  
270 in promoting comprehension were, in order of increasing coefficient, Intentions (L), (I),  
271 (H), (C), (G), (E), and (D).

272 As for visual description techniques, (a), (g), (f), (d), (b), and (e) had a significant  
273 influence, in that order.

274 From these, the distinctive results for getting interested are the magnitude of the negative  
275 impact of Intention (B), the magnitude of the coefficient of Intention (D), and the

276 magnitude of the coefficient of visual description techniques (e). In contrast, the features  
277 that stand out for promoting comprehension are the large coefficients of Intentions (E)  
278 and (I), the large difference in the coefficient of visual description techniques  $a$ , and the  
279 large coefficient of (d).

280

### 281 ***Result differences between illustration details and interests***

282 We discuss the coefficients against the degree of interest for the three types of illustrations  
283 (HD, MD, and LD). As these three were treated as categorical variables, they are  
284 calculated as the coefficients of the other depictions compared to the HD. The results  
285 showed that the HD had the most positive impact on the level of interest. The MD had a  
286 lower impact, and the LD had the lowest impact.

287

### 288 **Discussion**

289 ***The key findings of this study are described below.***

290 First, with regard to the relationship between the illustrator's intentions and the  
291 respondent's reception, the finding was that interest was more enhanced when the

292 techniques used in the illustration were correctly conveyed than when what was intended  
293 to be expressed in the illustration was conveyed as intended. When comparing getting  
294 interested and promoting comprehension, correspondence of the visual description  
295 techniques was more critical in the latter

296 In this research, we found that interest decreased significantly when negative intention  
297 (i.e., “(B) Feel sick”) was conveyed to the respondents. In contrast, we found that to  
298 promote comprehension of disease-related information by using illustrations, it is  
299 important to correctly convey the method of visual description techniques; in particular,  
300 “(a) Compare with normal and abnormal” was found to be remarkably important.

301 Additionally, there were six intentions (C, D, G, H, I, L) and four visual description  
302 techniques (d, e, f, g) as common positive factors for both getting interest and promoting  
303 comprehension. Moreover, the HD had the most positive impact on the level of interest.  
304 The MD had a lower impact, and the schematic depiction had the lowest impact in this  
305 study.

306

307 *Effect of intention matches*



308 First, we would like to discuss the effect of negative intentions. This research showed that  
309 negative intentions (i.e., “(B) Feel sick”) decrease the interest in the content. This result  
310 could be connected with a previous study’s viewpoint (34) that an uncomfortable feeling  
311 from seeing visual material could generate disinterest in the content.

312 As the goal of this study is to accurately communicate medical information to patients  
313 and laypersons and maintain interest in the information, we could say that the use of  
314 uncomfortable visual descriptions is not desirable. Unfortunately, this research could not  
315 reveal where the impression of “(B) Feel sick” stemmed from. It might come from visual  
316 descriptions of the illustration or it may depend on the participant’s experiences and  
317 characteristics. Therefore, it could be said that further research is needed to explain these  
318 points in more detail.

319 Meanwhile, another negative intention, “(L) A sense of danger,” is one of the most  
320 important factors to getting interested and promoting comprehension of content. This  
321 result may be possibly related to the function of graphic warning labels such as those on  
322 cigarette packs. Previous researches showed that when people get aware of some risks,  
323 they try to avoid potentially dangerous activities (35, 36). Therefore, there is some

324 possibility that the impression of “(L) A sense of danger” could be used to encourage  
325 people to get interested and promote comprehension of the content to avoid some critical  
326 situations.

327 Applying these two points for the RQ of this study, we could say that if the illustrator’s  
328 intentions match the recipients, especially if the negative intentions match, then there is  
329 a possibility of affecting content interest. Notably, an awkward intention—” (B) Feel  
330 sick”—would have the potential influence of decreasing interest in the content, whereas  
331 intentions related to the individual health situation, like “(L) A sense of danger and (I)  
332 Fear,” could be effective for not only generating interest but also boosting comprehension  
333 of the content.

334 Therefore, it can be suggested that conveying a sense of risk to an individual might be  
335 useful to boost interest in and understanding of medical information content.

336 However, it is still difficult to generalize these points, and we need to determine how to  
337 achieve these results in medical illustrations using different medical information. To  
338 standardize these results, further research is required.

339

340 *Effect of visual description technique matches*

341 We would also like to mention the impact of the match of visual description techniques.

342 In this study, we used illustrations created by six art professionals, which were composed

343 of a composite of seven visual description techniques. Among them, when illustrators’

344 and recipients’ cognition matched using “(a) Compare with normal and abnormal,”

345 comparing normal kidneys and ADPKD-affected kidneys had a strong impact on

346 promoting comprehension of content. Additionally, matching using “(d) Description of

347 progression of disease” was also found to be effective in promoting comprehension.

348 Moreover, in “(g) Description of features,” the characteristics of the kidney were

349 emphasized, which, in terms of illustration detail, was found to be effective in both getting

350 interest and promoting comprehension of its content.

351 This study is the first one to divide the visual descriptions technique into several factors

352 and investigate whether a match of visual description techniques with recipients can affect

353 the impression or comprehension of information. Therefore, these findings have possibly

354 become new perceptions in this research field.

355 We also assumed that we could only mention some techniques related to the types of

356 illustration detail using previous research results. Some previous studies showed that HD  
357 illustrations are the most efficient to boost comprehension of the content. Hence, using a  
358 technique of “(g) Description of features,” it could be possible to regard the use of HD  
359 for illustration as the most suitable method of conveying medical information to patients  
360 and laypersons.

361 Taking together these results, we could say that if the illustrator’s visual description  
362 techniques match recipient perceptions, techniques about disease transformation, like “(a)  
363 Compare with normal and abnormal” and “(d) Description of progression of disease,”  
364 could be effective to boost comprehension of the information.

365

### 366 ***Limitations***

367 There are some limitations to this research.

368 First, this research has an exploratory design and was conducted using certain medical  
369 information. Therefore, the results could not be standardized and need further research  
370 using various medical information for confirmation.

371 Second, we recruited some art professionals to create medical illustrations, most of whom

372 have no training as medical illustrators. Therefore, whether using those illustrations for  
373 research was desirable or not, is a controversial issue.

374 Third, this research gathered participants online. It cannot be confirmed whether this  
375 participants' group represents our society correctly. With a change in groups, the results  
376 have the possibility of changing.

377

### 378 **Conclusion**

379 In this study, we focused on the function of medical illustrations to convey medical  
380 information to contribute smooth health communication between doctors or researchers  
381 and patients or laypersons and set an exploratory RQ that includes new points of view  
382 about illustrations' intentions and visual description techniques.

383 As a result, we found that if the illustrator's intentions and visual description techniques  
384 match with the recipients, this could help generate interest in the content, and a match of  
385 visual description techniques could enhance the comprehension of the information.

386 These results have not been standardized yet and only apply to a particular kind of  
387 medical information and specific population group. Still, it can be said that it would be

388 possible to use these results for actual practices experimentally and for further exploratory

389 research.

390

### 391 **Acknowledgments**

392 The authors thank all participants, art professionals, and the technical support team at

393 Macromill Inc.

394

395 **References**

- 396 1. Petracci M, Schwarz PK, Sanchez Antelo VIM, Mendes Diz AM. Doctor–patient  
397 relationships amid changes in contemporary society: A view from the health  
398 communication field. *Health Sociology Review*. 2017;26(3):266-79.
- 399 2. Kurtz SM. Doctor-patient communication: principles and practices. *Canadian*  
400 *Journal of Neurological Sciences*. 2002;29(S2):S23-S9.
- 401 3. Ong LM, De Haes JC, Hoos AM, Lammes FB. Doctor-patient communication: a  
402 review of the literature. *Social science & medicine*. 1995;40(7):903-18.
- 403 4. Ha JF, Longnecker N. Doctor-patient communication: a review. *Ochsner Journal*.  
404 2010;10(1):38-43.
- 405 5. Brown RS, Peikes D, Peterson G, Schore J, Razafindrakoto CM. Six features of  
406 Medicare coordinated care demonstration programs that cut hospital admissions of  
407 high-risk patients. *Health affairs*. 2012;31(6):1156-66.
- 408 6. Timmermans S. The engaged patient: The relevance of patient–physician  
409 communication for twenty-first-century health. *Journal of Health and Social*  
410 *Behavior*. 2020;61(3):259-73.

- 411 7. Riedl D, Schüßler G. The influence of doctor-patient communication on health  
412 outcomes: a systematic review. *Zeitschrift für Psychosomatische Medizin und*  
413 *Psychotherapie*. 2017;63(2):131-50.
- 414 8. Ward P. Trust and communication in a doctor-patient relationship: a literature  
415 review. *Arch Med*. 2018;3(3):36.
- 416 9. Jahan F, Siddiqui H. Good Communication between Doctor-Patient Improves  
417 Health Outcome. *European Journal of Medical and Health Sciences*. 2019;1.
- 418 10. Thompson CL, Pledger LM. Doctor-patient communication: is patient knowledge  
419 of medical terminology improving? *Health Communication*. 1993;5(2):89-97.
- 420 11. Rowland-Morin PA, Carroll JG. Verbal communication skills and patient  
421 satisfaction: A study of doctor-patient interviews. *Evaluation & the health*  
422 *professions*. 1990;13(2):168-85.
- 423 12. Vogel D, Meyer M, Harendza S. Verbal and non-verbal communication skills  
424 including empathy during history taking of undergraduate medical students. *BMC*  
425 *medical education*. 2018;18(1):1-7.
- 426 13. Matusitz J, Spear J. Effective doctor–patient communication: an updated



- 427 examination. *Social work in public health*. 2014;29(3):252-66.
- 428 14. Marcinowicz L, Konstantynowicz J, Godlewski C. Patients' perceptions of GP non-  
429 verbal communication: a qualitative study. *British Journal of General Practice*.  
430 2010;60(571):83-7.
- 431 15. Schouten BC, Meeuwesen L. Cultural differences in medical communication: a  
432 review of the literature. *Patient education and counseling*. 2006;64(1-3):21-34.
- 433 16. Schouten BC, Meeuwesen L, Tromp F, Harmsen HA. Cultural diversity in patient  
434 participation: the influence of patients' characteristics and doctors' communicative  
435 behaviour. *Patient education and counseling*. 2007;67(1-2):214-23.
- 436 17. Hajar R. Medical illustration: art in medical education. *Heart views: the official*  
437 *journal of the Gulf Heart Association*. 2011;12(2):83.
- 438 18. Houts PS, Doak CC, Doak LG, Loscalzo MJ. The role of pictures in improving  
439 health communication: a review of research on attention, comprehension, recall,  
440 and adherence. *Patient Educ Couns*. 2006;61(2):173-90.
- 441 19. Garcia-Retamero R, Okan Y, Cokely ET. Using visual aids to improve  
442 communication of risks about health: a review. *The Scientific World Journal*.

- 443 2012;2012.
- 444 20. Brotherstone H, Miles A, Robb KA, Atkin W, Wardle J. The impact of illustrations  
445 on public understanding of the aim of cancer screening. *Patient Educ Couns*.  
446 2006;63(3):328-35.
- 447 21. Delp C, Jones J. Communicating information to patients: the use of cartoon  
448 illustrations to improve comprehension of instructions. *Acad Emerg Med*.  
449 1996;3(3):264-70.
- 450 22. Choi J. Literature review: using pictographs in discharge instructions for older  
451 adults with low-literacy skills. *Journal of clinical nursing*. 2011;20(21-22):2984-  
452 96.
- 453 23. Park J, Zuniga J. Effectiveness of using picture-based health education for people  
454 with low health literacy: An integrative review. *Cogent Medicine*.  
455 2016;3(1):1264679.
- 456 24. Apter AJ, Paasche-Orlow MK, Remillard JT, Bennett IM, Ben-Joseph EP, Batista  
457 RM, et al. Numeracy and communication with patients: they are counting on us. *J*  
458 *Gen Intern Med*. 2008;23(12):2117-24.

- 459 25. Garcia-Retamero R, Hoffrage U. Visual representation of statistical information  
460 improves diagnostic inferences in doctors and their patients. *Social Science &*  
461 *Medicine*. 2013;83:27-33.
- 462 26. Garcia-Retamero R, Cokely ET, Hoffrage U. Visual aids improve diagnostic  
463 inferences and metacognitive judgment calibration. *Frontiers in Psychology*.  
464 2015;6:932.
- 465 27. Haragi M, Hayakawa M, Watanabe O, Takayama T. An exploratory study of the  
466 efficacy of medical illustration detail for delivering cancer information. *Journal of*  
467 *Visual Communication in Medicine*. 2021;44(1):2-11.
- 468 28. Haragi M, Yamaguchi R, Okuhara T, Kiuchi T. Questionnaire survey of a mock  
469 jury on their impressions of medical-legal illustrations aimed at reducing trauma  
470 and PTSD of jurors. *Journal of Visual Communication in Medicine*. 2020;43(2):67-  
471 75.
- 472 29. Strong J, Erolin C. Preference for detail in medical illustrations amongst  
473 professionals and laypersons. *J Vis Commun Med*. 2013;36(1-2):38-43.
- 474 30. Haragi M, Ishikawa H, Kiuchi T. Investigation of suitable illustrations in medical

- 475 care. *J Vis Commun Med.* 2019:1-11.
- 476 31. Levin JR. On functions of pictures in prose. In: Pirozzolo FJ, and Wittrock, M. C.,  
477 editor. *Neuropsychological and Cognitive Processes in Reading.* New York:  
478 Academic Press; 1981. p. 203-28.
- 479 32. Lanktree MB, Haghighi A, Guiard E, Iliuta I-A, Song X, Harris PC, et al.  
480 Prevalence estimates of polycystic kidney and liver disease by population  
481 sequencing. *Journal of the American Society of Nephrology.* 2018;29(10):2593-  
482 600.
- 483 33. Willey CJ, Blais JD, Hall AK, Krasa HB, Makin AJ, Czerwiec FS. Prevalence of  
484 autosomal dominant polycystic kidney disease in the European Union. *Nephrology  
485 Dialysis Transplantation.* 2017;32(8):1356-63.
- 486 34. Isen AM, Noonberg A. The Effect of Photographs of the Handicapped on Donation  
487 to Charity: When a Thousand Words May be too Much. *Journal of Applied Social  
488 Psychology.* 1979;9(5):426-31.
- 489 35. Evans AT, Peters E, Strasser AA, Emery LF, Sheerin KM, Romer D. Graphic  
490 warning labels elicit affective and thoughtful responses from smokers: results of a

- 491 randomized clinical trial. PloS one. 2015;10(12):e0142879.
- 492 36. Brewer NT, Parada Jr H, Hall MG, Boynton MH, Noar SM, Ribisl KM.
- 493 Understanding why pictorial cigarette pack warnings increase quit attempts. Annals
- 494 of Behavioral Medicine. 2019;53(3):232-43.

medRxiv preprint doi: <https://doi.org/10.1101/2022.04.04.22273410>; this version posted April 5, 2022. The copyright holder for this preprint (which was not certified by peer review) is the author/funder, who has granted medRxiv a license to display the preprint in perpetuity. It is made available under a [CC-BY 4.0 International license](#).

|                      | <b>High detail</b>                       | <b>Medium detail</b>                     | <b>Low detail</b>                        |
|----------------------|------------------------------------------|------------------------------------------|------------------------------------------|
| (0)<br>Normal detail | (1)<br>Getting interested<br>(HD)        | (2)<br>Getting interested<br>(MD)        | (3)<br>Getting interested<br>(LD)        |
|                      | (1)<br>Boosting<br>comprehension<br>(HD) | (2)<br>Boosting<br>comprehension<br>(MD) | (3)<br>Boosting<br>comprehension<br>(LD) |

**Figure1: Types of illustrations drawn by an illustrator.**

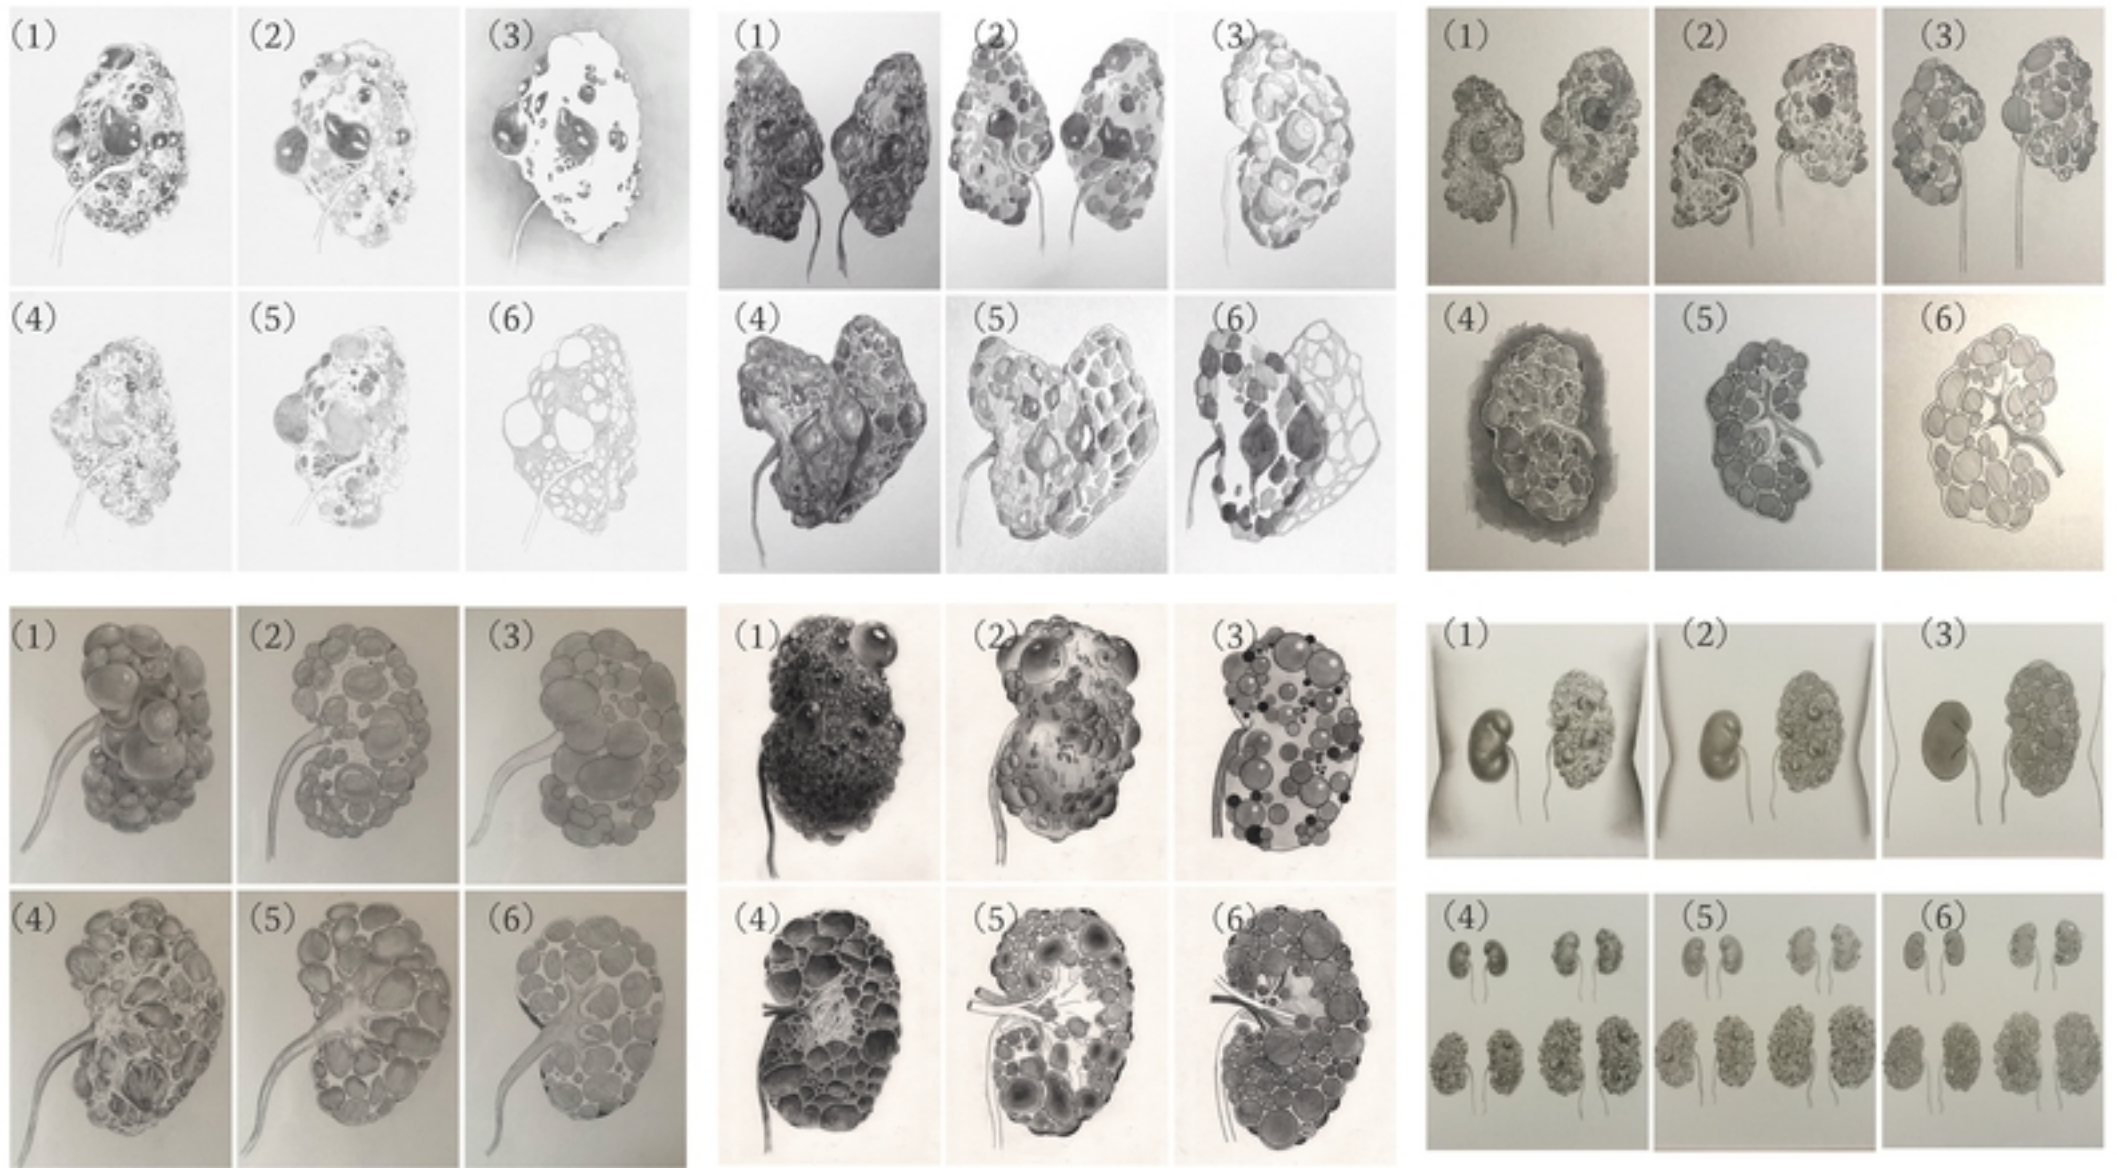

Figure 2: Illustrations created by six art professionals.
